# Supplementary material for: The effect of KH on enhancing the dehydrogenation properties of the Li–N–H system and its catalytic mechanism
Source: Royal Society of Chemistry journal article supplement (doi:10.1039/c8cp00470f), 2018-01-01
Supplement: c8cp00470f1.pdf [file c8cp00470f1.pdf]

## The effect of KH on enhancing the dehydrogenation properties of the Li–N–H system and its catalytic mechanism

Bao-Xia Dong, Lu Wang, Jun Ge, Cao Ping, Yun-Lei Teng\*, Zong-Wei Li

School of Chemistry and Chemical Engineering, Yangzhou University, Yangzhou, 225002, P. R. China

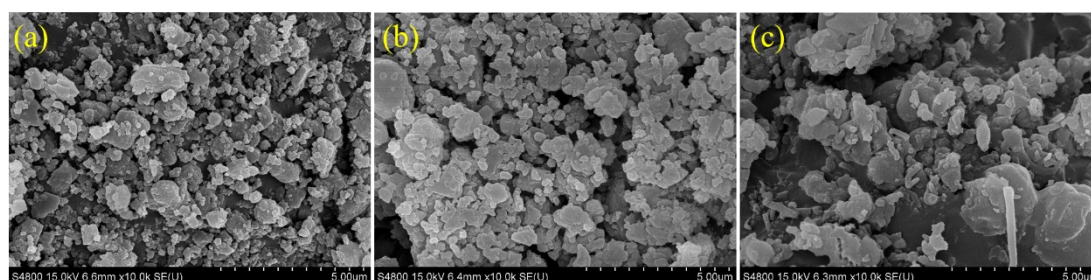

**Fig. S1.** SEM images of the ball-milled LiNH<sub>2</sub>-LiH sample (a), the ball-milled LiNH<sub>2</sub>-LiH-0.05 KH sample (b) and the dehydrogenated LiNH<sub>2</sub>-LiH-0.05 KH sample (c).
